# Supplementary material for: Transcriptomic analysis reveals that Bacillomycin D-C16 induces multiple pathways of disease resistance in cherry tomato
Source: BMC Genomics. 2023 Apr 26;24:218. doi: 10.1186/s12864-023-09305-5 (PMC10131338; doi:10.1186/s12864-023-09305-5)
Supplement: Supplementary file 2 — Additional file 2: Table S2. Table of RNA-seq data after Bacillomycin D-C16 treatment versus control at time 12 h. [file 12864_2023_9305_MOESM2_ESM.xlsx]

## Sheet: Table S2
Table S2 Table of RNA-seq data after Bacillomycin D-C16 treatment versus control at time 12 h
Gene_id	FC(BD12h/CK12h)	Log2FC(BD12h/CK12h)	Padjust	Regulate	CK12h_1_Fpkm	CK12h_2_Fpkm	CK12h_3_Fpkm	BD12h_1_Fpkm	BD12h_2_Fpkm	BD12h_3_Fpkm	CK12h_Fpkm	BD12h_Fpkm	description
Solyc09g010920.1	0.025	-5.325	0.001032	down	0.812	9.548	12.397	0.273	0.189	0.147	8.015	0.203	RecName: Full=Scarecrow-like protein 9; Short=AtSCL9; AltName: Full=GRAS family protein 13; Short=AtGRAS-13
Solyc04g078200.3	0.097	-3.364	9.81e-08	down	9.881	9.044	10.725	2.21	0.69	0.964	9.883	1.288	RecName: Full=Snakin-1; Flags: Precursor
Solyc10g078440.1	0.117	-3.095	0.0005133	down	16.469	19.674	9.965	3.258	3.535	0.611	15.369	2.468	_
Solyc01g100510.3	0.119	-3.077	0.002129	down	5.22	3.598	2.171	0.524	0.625	0.514	3.663	0.554	RecName: Full=Homeobox protein knotted-1-like 1; AltName: Full=Homeobox protein HOS16; AltName: Full=Homeobox protein OSH6
Solyc06g072830.3	0.129	-2.954	5.19e-13	down	11.621	8.831	14.918	2.272	2.303	1.071	11.79	1.882	RecName: Full=Cell division cycle 20.1, cofactor of APC complex; Short=AtCDC20.1
Solyc07g066050.3	0.137	-2.869	1.39e-06	down	5.075	3.84	4.402	1.248	0.505	0.582	4.439	0.778	_
Solyc07g007190.3	0.138	-2.854	0.003657	down	2.268	3.25	4.502	0.706	0.59	0.505	3.34	0.6	_
Solyc09g075550.3	0.146	-2.778	1.89e-08	down	2.714	2.408	4.802	0.674	0.664	0.521	3.308	0.586	RecName: Full=Cellulose synthase-like protein D5; Short=AtCslD5
Solyc06g072810.3	0.148	-2.756	4.6e-08	down	3.294	3.589	5.143	0.799	0.972	0.532	4.009	0.734	_
Solyc01g057640.1	0.159	-2.651	0.0001303	down	3.988	5.155	5.013	0.836	0.665	1.136	4.719	0.879	_
Solyc07g065210.3	0.173	-2.529	1.25e-08	down	2.217	2.089	3.002	0.504	0.531	0.501	2.436	0.512	RecName: Full=Kinesin-like protein KIN12A; AltName: Full=Phragmoplast-associated kinesin-related protein 1; Short=AtPAKRP1
Solyc02g083890.3	0.179	-2.48	0.0001974	down	9.446	6.926	10.956	2.634	2.932	0.611	9.109	2.059	_
Solyc02g093760.3	0.193	-2.377	8.88e-05	down	2.434	1.712	3.242	0.849	0.505	0.571	2.463	0.608	_
Solyc03g032190.3	0.196	-2.349	5.25e-06	down	3.304	3.385	5.253	1.286	1.133	0.503	3.981	0.974	RecName: Full=G2/mitotic-specific cyclin-1; AltName: Full=B-like cyclin; AltName: Full=CycMs1
Solyc12g088840.1	0.197	-2.343	0.01261	down	70.484	44.271	36.959	10.661	17.688	12.448	50.571	13.599	_
Solyc06g024386.1	0.199	-2.329	0.007427	down	798.364	536.217	599.917	37.413	57.61	151.369	644.833	82.131	_
Solyc01g048590.2	0.201	-2.312	0.002703	down	132.424	105.547	133.728	69.071	38.727	13.316	123.9	40.371	RecName: Full=Photosystem Q(B) protein; AltName: Full=32 kDa thylakoid membrane protein; AltName: Full=Photosystem II protein D1; Flags: Precursor (chloroplast)
Solyc00g012435.1	0.225	-2.151	0.001366	down	181.312	132.359	211.928	59.372	26.877	78.02	175.2	54.756	_
Solyc11g027660.1	0.225	-2.151	0.005804	down	294.874	179.948	305.836	47.25	39.885	128.648	260.219	71.928	_
Solyc01g080750.3	0.236	-2.082	0.009297	down	10.969	6.887	16.258	4.482	4.595	0.996	11.371	3.358	_
Solyc01g099040.3	0.238	-2.073	0.002012	down	8.39	8.222	10.996	5.168	1.774	1.264	9.203	2.735	RecName: Full=Acetylajmalan esterase; Flags: Precursor
Solyc09g083280.3	0.23	-2.069	0.003252	down	6.729	6.085	2.646	1.378	0.542	1.051	5.153	0.99	RecName: Full=Auxin-induced protein IAA4
Solyc08g078450.3	0.239	-2.062	3.93e-06	down	4.133	5.01	2.821	1.436	1.207	0.889	3.988	1.177	RecName: Full=Probable glycosyltransferase At5g03795
Solyc01g109750.2	0.241	-2.053	0.007691	down	3.604	2.96	5.633	2.097	1.281	0.561	4.066	1.28	RecName: Full=Syntaxin-112; Short=AtSYP112
Solyc11g071730.2	0.242	-2.045	0.0003143	down	1.46	1.664	2.962	0.736	0.616	0.504	2.029	0.605	_
Solyc08g066050.3	0.245	-2.028	0.02043	down	3.781	3.54	5.643	2.21	1.503	0.543	4.321	1.352	RecName: Full=Serine/threonine-protein kinase Aurora-1; Short=AtAur1; AltName: Full=Aurora-like kinase 1
Solyc08g080400.1	0.247	-2.02	0.04646	down	1.958	1.103	2.161	0.524	0.508	0.55	1.741	0.547	RecName: Full=Scarecrow-like protein 28; Short=AtSCL28; AltName: Full=GRAS family protein 8; Short=AtGRAS-8
Solyc11g027645.1	0.248	-2.012	3.12e-08	down	5246.79	3196.57	5558.91	1451.26	1310.51	2077.01	4667.43	1612.92	_
Solyc01g014840.3	0.248	-2.011	1.55e-15	down	4.796	5.629	5.303	1.823	1.527	1.532	5.243	1.627	RecName: Full=TMV resistance protein N
Solyc05g010775.1	0.256	-1.967	0.04506	down	2.32	2.273	2.741	0.549	0.57	1.243	2.445	0.721	_
Solyc01g058500.3	0.262	-1.933	0.01262	down	368.166	226.56	401.125	65.214	80.841	186.131	331.95	110.729	_
Solyc09g072800.3	0.266	-1.91	0.001803	down	6.36	5.571	10.525	2.871	3.424	1.103	7.485	2.466	_
Solyc06g024230.1	0.271	-1.884	0.001256	down	408.985	244.396	518.555	113.076	113.705	190.588	390.645	139.123	_
Solyc01g094085.1	0.272	-1.876	0.04227	down	2.683	1.499	1.871	0.507	0.628	0.968	2.018	0.611	_
Solyc02g093720.3	0.274	-1.869	0.02693	down	2.403	2.118	4.212	1.585	1.084	0.532	2.911	1	_
Solyc00g095465.1	0.275	-1.86	0.001227	down	895.405	610.183	1086.82	227.487	265.718	443.137	864.135	312.114	RecName: Full=1-aminocyclopropane-1-carboxylate synthase; Short=ACC synthase; AltName: Full=S-adenosyl-L-methionine methylthioadenosine-lyase
Solyc00g203660.2	0.279	-1.843	0.002793	down	8.359	4.914	9.685	2.472	2.858	2.421	7.653	2.584	RecName: Full=Ribulose bisphosphate carboxylase large chain; Short=RuBisCO large subunit; Flags: Precursor (chloroplast)
Solyc01g009040.3	0.28	-1.836	0.03014	down	2.589	1.296	2.761	1.173	0.75	0.5	2.215	0.774	RecName: Full=Cyclin-B1-1; AltName: Full=G2/mitotic-specific cyclin-B1-1; Short=CycB1;1
Solyc12g006360.2	0.288	-1.794	2.62e-09	down	2.393	2.321	1.991	0.924	0.665	0.75	2.235	0.78	_
Solyc00g009760.2	0.293	-1.773	0.01049	down	609.49	364.104	667.111	130.503	137.601	311.887	546.902	193.33	_
Solyc09g074470.3	0.293	-1.772	0.04695	down	2.755	2.157	5.093	1.835	1.404	0.539	3.335	1.226	_
Solyc11g051200.1	0.295	-1.76	0.007922	down	1089.3	588.768	1150.45	284.574	208.44	458.413	942.84	317.142	_
Solyc10g047090.2	0.296	-1.758	0.02644	down	33.808	33.119	33.797	23.494	13.734	8.324	33.575	15.184	RecName: Full=50S ribosomal protein L2, chloroplastic (chloroplast)
Solyc07g052850.1	0.297	-1.751	0.006489	down	1.75	1.973	2.031	0.504	0.518	0.948	1.918	0.657	_
Solyc02g087880.3	0.298	-1.746	0.0001452	down	4.029	5.223	5.893	2.384	2.205	0.996	5.048	1.862	RecName: Full=Tubulin alpha chain
Solyc04g082840.3	0.302	-1.727	0.00982	down	10.368	10.059	17.769	7.016	5.543	1.939	12.732	4.833	RecName: Full=Cell division control protein 2 homolog D
Solyc10g049215.1	0.305	-1.714	0.001885	down	26.609	21.164	30.055	8.676	9.509	20.311	25.943	12.832	_
Solyc00g068970.2	0.308	-1.698	0.006241	down	1971.61	1128.07	2323.66	496.357	502.107	981.081	1807.78	659.848	_
Solyc07g032230.3	0.316	-1.661	7.5e-08	down	122.936	126.904	96.179	42.556	39.565	49.117	115.34	43.746	RecName: Full=IST1 homolog; Short=hIST1; AltName: Full=Putative MAPK-activating protein PM28
Solyc11g044610.1	0.32	-1.643	0.03946	down	11.031	4.478	10.625	4.157	3.818	2.603	8.711	3.526	_
Solyc01g105495.1	0.32	-1.642	0.03728	down	2.082	2.089	2.881	0.562	0.628	1.403	2.351	0.864	_
Solyc11g012020.2	0.322	-1.635	0.04337	down	5.169	8.947	15.188	4.943	5.112	1.682	9.768	3.912	_
Solyc11g027710.1	0.324	-1.626	0.00845	down	2349.81	1426.09	2791	738.075	651.546	1427.55	2188.97	939.057	_
Solyc09g015170.3	0.324	-1.624	0.02382	down	6.94	5.571	12.496	2.222	2.488	4.649	8.336	3.12	RecName: Full=Probably inactive leucine-rich repeat receptor-like protein kinase IMK2; AltName: Full=Protein INFLORESCENCE MERISTEM RECEPTOR-LIKE KINASE 2; Flags: P
Solyc00g006680.2	0.331	-1.596	0.009076	down	1178.63	746.401	1505.45	327.093	381.763	661.064	1143.49	456.64	RecName: Full=Putative uncharacterized protein ART2; AltName: Full=Antisense to ribosomal RNA transcript protein 2
Solyc10g050670.1	0.331	-1.595	1.33e-10	down	7.53	6.868	6.583	4.631	3.584	1.703	6.994	3.306	_
Solyc01g060085.1	0.332	-1.592	0.006682	down	13.579	11.143	21.741	7.44	7.785	4.36	15.488	6.528	RecName: Full=Ribulose bisphosphate carboxylase large chain; Short=RuBisCO large subunit; Flags: Precursor (chloroplast)
Solyc03g120580.3	0.332	-1.589	3.09e-07	down	6.909	7.825	6.884	2.896	2.488	3.182	7.206	2.855	_
Solyc11g027690.1	0.338	-1.565	0.004383	down	1118.11	681.847	1299.11	344.532	318.401	578.877	1033.02	413.937	_
Solyc02g088513.1	0.338	-1.564	0.02494	down	6.67	5.629	8.885	3.321	2.045	4.135	7.061	3.167	RecName: Full=Probable mitochondrial saccharopine dehydrogenase-like oxidoreductase At5g39410; Short=SDH
Solyc03g113090.3	0.338	-1.564	0.03554	down	18.157	19.355	32.837	12.821	13.402	3.567	23.45	9.93	_
Solyc11g011300.2	0.338	-1.563	0.01545	down	18.219	21.386	11.026	9.038	9.14	3.321	16.877	7.166	_
Solyc04g064650.1	0.339	-1.562	0.02288	down	1.678	2.263	1.381	0.874	0.517	0.793	1.774	0.728	RecName: Full=Pentatricopeptide repeat-containing protein At1g08070
Solyc02g089500.3	0.347	-1.528	0.000683	down	22.549	16.25	21.881	6.928	8.167	10.37	20.227	8.488	RecName: Full=Zinc finger protein CONSTANS-LIKE 1
Solyc05g016120.2	0.348	-1.521	0.04737	down	30.711	19.78	26.984	11.922	18.107	4.221	25.825	11.417	RecName: Full=Photosystem Q(B) protein; AltName: Full=32 kDa thylakoid membrane protein; AltName: Full=Photosystem II protein D1; Flags: Precursor (chloroplast)
Solyc06g074470.3	0.349	-1.518	0.009994	down	1.315	1.412	1.211	0.512	0.505	0.75	1.313	0.536	_
Solyc01g100630.2	0.35	-1.515	0.01313	down	48.754	43.594	35.918	12.746	11.751	26.621	42.755	17.039	RecName: Full=Catalase isozyme 2
Solyc01g107290.3	0.352	-1.508	2.36e-11	down	119.808	123.286	97.98	56.113	57.351	53.991	113.691	55.818	_
Solyc00g090115.1	0.357	-1.484	0.02288	down	578.21	391.332	740.469	183.208	189.878	369.317	570.004	247.468	_
Solyc01g087500.3	0.365	-1.456	0.001991	down	1.895	2.66	4.232	1.248	1.306	1.264	2.929	1.273	RecName: Full=DNA topoisomerase 2; AltName: Full=DNA topoisomerase II
Solyc05g006145.1	0.366	-1.451	0.0003572	down	27.893	39.116	30.015	17.627	17.22	10.777	32.341	15.208	RecName: Full=UDP-glycosyltransferase 74B1; AltName: Full=N-hydroxythioamide S-beta-glucosyltransferase; AltName: Full=Thiohydroximate S-glucosyltransferase
Solyc04g080390.3	0.373	-1.424	0.0001855	down	56.667	45.703	39.03	19.462	18.316	25.003	47.133	20.927	_
Solyc09g072583.1	0.375	-1.415	0.03693	down	65.067	72.641	68.735	32.12	23.207	45.496	68.814	33.608	RecName: Full=Tubulin beta-2 chain; AltName: Full=Beta-2-tubulin
Solyc01g104930.2	0.375	-1.414	0.0002524	down	8.007	7.467	9.455	4.694	4.484	2.475	8.31	3.884	RecName: Full=Vesicle-fusing ATPase; AltName: Full=N-ethylmaleimide-sensitive fusion protein; AltName: Full=Vesicular-fusion protein NSF
Solyc09g007680.3	0.377	-1.407	9.98e-11	down	28.681	25.294	24.643	12.895	11.061	12.394	26.206	12.117	RecName: Full=Probable E3 ubiquitin-protein ligase LOG2; AltName: Full=Protein LOSS OF GDU2; AltName: Full=RING finger protein 215
Solyc01g102840.3	0.378	-1.402	0.0001695	down	54.647	49.717	34.618	20.835	18.772	23.343	46.327	20.983	RecName: Full=TMV resistance protein N
Solyc09g090030.2	0.379	-1.4	0.01036	down	3.542	2.795	2.761	1.211	1.626	1.296	3.033	1.378	RecName: Full=Histone-lysine N-methyltransferase ASHR2; AltName: Full=ASH1-related protein 2; AltName: Full=Protein SET DOMAIN GROUP 39
Solyc02g089493.1	0.38	-1.396	0.01648	down	24.993	20.622	26.664	7.927	8.746	15.63	24.093	10.768	RecName: Full=Zinc finger protein CONSTANS-LIKE 1
Solyc04g071890.3	0.381	-1.393	0.04227	down	96.544	110.248	73.308	31.134	36.46	64.586	93.367	44.06	RecName: Full=Peroxidase 12; Short=Atperox P12; AltName: Full=ATP4a; AltName: Full=PRXR6; Flags: Precursor
Solyc02g069430.3	0.382	-1.389	0.002107	down	118.43	93.098	78.93	57.849	54.691	24.693	96.819	45.744	RecName: Full=Putative phospholipid-transporting ATPase 7; Short=AtALA7; AltName: Full=Aminophospholipid flippase 7
Solyc12g009050.2	0.382	-1.388	0.0001695	down	22.456	19.181	14.948	8.788	9.361	10.027	18.862	9.392	_
Solyc06g076040.3	0.382	-1.387	4.8e-06	down	41.006	38.748	26.944	18.114	16.346	14.119	35.566	16.193	RecName: Full=U-box domain-containing protein 13; AltName: Full=Plant U-box protein 13
Solyc09g055180.3	0.389	-1.361	0.001816	down	4.019	3.24	2.261	1.698	1.429	1.607	3.173	1.578	RecName: Full=Probable LRR receptor-like serine/threonine-protein kinase At1g06840; Flags: Precursor
Solyc03g116245.1	0.39	-1.358	0.0009701	down	1.699	1.867	2.121	0.874	0.862	0.921	1.896	0.886	_
Solyc08g061160.2	0.394	-1.343	0.01885	down	433.544	275.532	631.843	276.834	304.494	141.61	446.973	240.979	_
Solyc04g010280.2	0.395	-1.341	0.01474	down	5.676	4.865	4.672	2.135	2.784	2.357	5.071	2.425	_
Solyc03g007395.1	0.395	-1.34	0.008401	down	8.058	6.558	7.714	2.884	2.513	4.778	7.443	3.392	_
Solyc10g006190.3	0.397	-1.332	0.004162	down	16.117	15.786	13.607	5.88	6.405	9.695	15.17	7.327	RecName: Full=Cell differentiation protein RCD1 homolog; Short=Rcd-1 RCD1_XENTR RecName: Full=Cell differentiation protein RCD1 homolog; Sho
Solyc02g070855.1	0.398	-1.329	5.23e-07	down	8.991	7.651	7.364	3.982	3.72	3.76	8.002	3.821	_
Solyc04g082980.2	0.4	-1.323	0.001246	down	295.382	204.41	255.551	148.953	152.974	64.49	251.781	122.139	_
Solyc11g065610.1	0.401	-1.317	0.001359	down	5.469	17.091	4.682	3.42	2.303	2.764	9.081	2.829	_
Solyc12g098700.1	0.421	-1.247	0.04559	down	107.047	103.428	94.318	37.825	35.684	74.388	101.598	49.299	_
Solyc10g083380.2	0.422	-1.243	0.01989	down	44.849	40.141	27.494	17.39	17.799	23.225	37.495	19.471	_
Solyc12g036160.2	0.423	-1.242	0.003156	down	2.227	2.273	3.622	1.398	1.195	1.575	2.707	1.389	_
Solyc02g071800.3	0.423	-1.24	3.71e-11	down	17.525	16.037	16.328	9.6	8.228	7.949	16.63	8.592	RecName: Full=Probable LRR receptor-like serine/threonine-protein kinase At1g07650; Flags: Precursor
Solyc03g046207.1	0.424	-1.238	0.03693	down	9.032	7.429	8.074	5.817	3.917	6.074	8.178	5.269	RecName: Full=Probable disease resistance protein At1g12280
Solyc06g076210.2	0.425	-1.234	0.03492	down	12.875	9.876	5.493	7.116	5.802	3.921	9.415	5.613	_
Solyc04g009435.1	0.427	-1.228	0.006953	down	1.74	1.644	1.341	0.712	0.936	0.932	1.575	0.86	RecName: Full=Protein ATAF2; AltName: Full=NAC domain-containing protein 81; Short=ANAC081
Solyc02g089490.3	0.427	-1.227	0.001883	down	34.823	29.598	35.138	14.281	13.513	21.307	33.186	16.367	_
Solyc01g057680.3	0.427	-1.227	0.04518	down	12.626	6.374	8.394	5.281	7.76	2.571	9.131	5.204	_
Solyc05g013710.3	0.432	-1.211	0.003941	down	9.695	10.911	15.318	8.077	8.068	3.642	11.975	6.596	RecName: Full=SufE-like protein 2, chloroplastic; AltName: Full=Protein SULFUR E 2
Solyc01g104240.3	0.432	-1.211	0.001619	down	17.007	16.047	16.178	9.088	7.92	11.548	16.411	9.519	_
Solyc02g064680.3	0.433	-1.207	6.13e-05	down	26.112	31.716	22.932	14.556	13.032	14.162	26.92	13.917	RecName: Full=Calcium-transporting ATPase 2, plasma membrane-type; AltName: Full=Ca(2+)-ATPase isoform 2
Solyc02g092517.1	0.435	-1.201	0.04955	down	10.13	7.477	6.393	3.62	3.141	5.678	8	4.146	_
Solyc03g097050.3	0.436	-1.198	0.001394	down	38.904	44.155	26.834	18.875	20.275	19.261	36.631	19.47	RecName: Full=Cellulose synthase-like protein D3; Short=AtCslD3; AltName: Full=Protein KOJAK
Solyc05g011960.3	0.436	-1.196	0.03685	down	120.46	103.458	86.834	46.002	42.422	74.656	103.584	54.36	_
Solyc07g041620.1	0.437	-1.195	4.8e-05	down	113.396	78.512	136.04	39.935	49.16	41.918	109.316	43.671	_
Solyc11g020330.1	0.437	-1.193	0.001566	down	55.258	40.702	50.586	23.07	34.095	22.571	48.849	26.579	_
Solyc02g089515.1	0.438	-1.192	0.02817	down	38.044	25.342	34.648	11.972	17.528	21.939	32.678	17.146	_
Solyc07g042500.3	0.438	-1.192	6.68e-05	down	13.786	10.582	9.625	7.59	6.319	4.724	11.331	6.211	_
Solyc08g007330.3	0.438	-1.19	0.001958	down	2.279	2.321	2.031	1.086	1.195	1.189	2.21	1.157	RecName: Full=DNA mismatch repair protein MSH4; Short=AtMSH4; AltName: Full=MutS protein homolog 4
Solyc02g090380.3	0.438	-1.19	2.26e-07	down	16.407	18.078	16.318	10.598	9.546	7.006	16.934	9.05	RecName: Full=Probable disease resistance protein At5g66900
Solyc01g088240.3	0.439	-1.188	0.04977	down	26.588	19.809	19.19	9.3	15.175	11.698	21.862	12.058	_
Solyc01g099660.3	0.439	-1.187	1.38e-05	down	7.064	5.494	5.713	3.271	3.313	2.978	6.09	3.187	RecName: Full=Mediator of RNA polymerase II transcription subunit 37a; AltName: Full=Heat shock 70 kDa protein 11; AltName: Full=Heat shock protein 70-11; Short=At
Solyc12g010745.1	0.443	-1.174	0.0038	down	48.008	49.059	34.868	22.146	20.669	27.199	43.978	23.338	_
Solyc02g089495.1	0.445	-1.167	0.007883	down	93.189	78.464	73.177	39.186	36.645	56.263	81.61	44.031	_
Solyc11g005660.2	0.448	-1.158	0.02089	down	19.545	18.107	18.039	9.4	7.514	12.887	18.564	9.934	_
Solyc03g095770.3	0.449	-1.154	0.01493	down	27.199	36.727	32.797	15.679	14.116	21.886	32.241	17.227	RecName: Full=Probable WRKY transcription factor 70; AltName: Full=WRKY DNA-binding protein 70
Solyc02g078780.3	0.452	-1.146	0.0038	down	2.113	1.954	2.631	1.211	1.478	0.986	2.233	1.225	RecName: Full=Protein STRUBBELIG-RECEPTOR FAMILY 1; AltName: Full=Leucine-rich repeat receptor kinase-like protein SRF1; Flags: Precursor
Solyc11g042523.1	0.453	-1.144	0.004083	down	7.292	5.581	7.494	4.919	4.607	5.71	6.789	5.079	_
Solyc01g096070.3	0.454	-1.139	0.01048	down	115.787	100.611	71.925	44.394	52.08	58.793	96.11	51.758	RecName: Full=Auxin response factor 11
Solyc01g107415.1	0.454	-1.138	0.04483	down	4.122	3.028	2.521	1.66	1.601	1.896	3.224	1.719	_
Solyc10g018530.2	0.457	-1.131	0.005657	down	3.491	4.121	3.312	2.197	1.897	2.496	3.641	2.197	RecName: Full=DNA mismatch repair protein MSH5; Short=AtMSH5; AltName: Full=MutS protein homolog 5
Solyc04g082990.3	0.458	-1.127	0.003813	down	26.485	20.206	22.241	16.391	14.683	7.745	22.977	12.94	RecName: Full=Uncharacterized protein ycf68; AltName: Full=ORF113 (chloroplast)
Solyc10g083880.2	0.458	-1.126	0.0393	down	297.039	471.217	270.749	246.3	231.893	119.703	346.335	199.299	_
Solyc08g005610.3	0.459	-1.123	0.001883	down	23.698	32.181	27.534	15.18	13.623	16.99	27.804	15.264	RecName: Full=Abscisic acid 8'-hydroxylase 1; Short=ABA 8'-hydroxylase 1; AltName: Full=Cytochrome P450 707A1
Solyc10g048060.1	0.46	-1.121	0.0302	down	198.516	144.421	238.802	117.47	130.001	140.785	193.913	129.419	RecName: Full=Uncharacterized mitochondrial protein AtMg00030; AltName: Full=ORF107a (mitochondrion)
Solyc07g063590.3	0.462	-1.115	0.02427	down	4.298	4.604	4.852	3.208	3.24	1.318	4.585	2.589	RecName: Full=Myosin-2; AltName: Full=AtATM2; AltName: Full=AtMYOS1
Solyc01g108410.2	0.464	-1.107	0.04712	down	23.398	20.912	17.909	9.65	10.162	14.591	20.74	11.468	RecName: Full=Pentatricopeptide repeat-containing protein At5g39710; AltName: Full=Protein EMBRYO DEFECTIVE 2745
Solyc03g119940.3	0.469	-1.092	0.001033	down	1.761	1.306	2.041	1.024	0.973	0.868	1.703	0.955	_
Solyc01g006880.3	0.472	-1.084	0.04083	down	39.349	29.83	29.535	22.495	18.329	24.618	32.905	21.814	RecName: Full=Histone-lysine N-methyltransferase SETD1B; AltName: Full=Lysine N-methyltransferase 2G; AltName: Full=SET domain-containing protein 1B; Short=hSET1B
Solyc12g017230.2	0.472	-1.082	0.007795	down	76.14	72.109	54.798	36.926	35.413	45.004	67.682	39.114	_
Solyc06g051330.1	0.478	-1.064	0.003252	down	27.396	41.766	18.509	5.106	5.715	5.517	29.224	5.446	_
Solyc01g103910.1	0.483	-1.05	0.0387	down	6.65	4.981	3.412	3.246	2.981	2.646	5.014	2.958	RecName: Full=Phospholipase D beta 1; Short=AtPLDbeta1; Short=PLD beta 1; Short=PLDbeta
Solyc12g006980.1	0.484	-1.047	0.04665	down	296.625	239.937	236.701	210.959	190.53	78.77	257.754	160.086	_
Solyc08g066700.3	0.485	-1.045	0.02043	down	698.784	633.629	415.583	480.003	481.13	212.72	582.665	391.284	RecName: Full=Exosome complex exonuclease RRP46 homolog; AltName: Full=Exosome component 5; AltName: Full=Ribosomal RNA-processing protein 46; Short=oRrp46
Solyc01g110660.3	0.486	-1.042	0.0129	down	101.236	106.263	104.033	52.144	51.525	74.902	103.844	59.524	RecName: Full=small auxin-up RNA
Solyc06g071780.3	0.486	-1.041	0.0017	down	7.83	7.506	6.573	5.455	4.742	2.882	7.303	4.36	RecName: Full=Protein DEHYDRATION-INDUCED 19 homolog 6; AltName: Full=OsDi19-6
Solyc01g099645.1	0.487	-1.039	8.88e-05	down	54.285	48.247	45.753	36.539	33.603	30.467	49.428	33.536	_
Solyc01g105520.3	0.488	-1.036	0.001925	down	8.918	7.564	10.776	5.281	5.013	5.635	9.086	5.31	RecName: Full=Probable DNA helicase MCM9; AltName: Full=Minichromosome maintenance 9; Short=AtMCM9
Solyc03g117570.3	0.488	-1.035	0.03577	down	3.076	2.447	2.681	1.323	1.54	1.896	2.735	1.586	RecName: Full=Pentatricopeptide repeat-containing protein At1g80880, mitochondrial; Flags: Precursor
Solyc06g066330.3	0.488	-1.035	0.00144	down	51.996	54.35	50.506	33.081	30.893	34.955	52.284	32.976	RecName: Full=Inactive poly
Solyc07g064030.3	0.493	-1.019	0.02427	down	2.921	2.554	3.272	2.347	1.848	1.125	2.916	1.773	RecName: Full=Kinesin-1; AltName: Full=Kinesin-like protein A
Solyc09g015770.3	0.494	-1.016	0.01612	down	376.027	379.038	220.013	221.083	192.686	172.226	325.026	195.332	RecName: Full=Probable WRKY transcription factor 70; AltName: Full=WRKY DNA-binding protein 70
Solyc02g071860.3	0.494	-1.016	0.01569	down	14.667	13.938	14.537	8.214	6.824	10.455	14.381	8.498	RecName: Full=Probable LRR receptor-like serine/threonine-protein kinase At1g07650; Flags: Precursor
Solyc12g006225.1	0.496	-1.013	0.04374	down	19.524	21.744	19.76	10.798	9.583	15.437	20.343	11.939	_
Solyc11g072430.2	0.496	-1.013	0.001394	down	40.892	33.022	32.847	21.047	20.139	23.621	35.587	21.602	_
Solyc09g075760.3	0.498	-1.005	0.0002909	down	74.047	62.736	64.763	50.583	43.679	48.978	67.182	47.747	RecName: Full=Long chain acyl-CoA synthetase 6, peroxisomal; Flags: Precursor
Solyc06g050440.3	2.008	1.006	0.04379	up	12.253	7.283	5.603	22.67	23.527	18.983	8.38	21.727	RecName: Full=Peroxidase 4; Flags: Precursor
Solyc01g111075.1	2.011	1.008	0.006023	up	188.076	137.901	142.093	531.71	463.245	285.351	156.023	426.769	RecName: Full=Snakin-2; Flags: Precursor
Solyc03g006620.3	2.015	1.011	0.002879	up	20.974	15.611	13.457	48.811	39.872	34.527	16.681	41.07	_
Solyc01g111630.3	2.021	1.015	0.0003143	up	3.045	3.124	3.682	7.64	8.98	7.37	3.284	7.997	RecName: Full=Glycerate dehydrogenase HPR, peroxisomal; Short=GDH; AltName: Full=NADH-dependent hydroxypyruvate reductase 1; Short=AtHPR1; Short=HPR 1
Solyc11g017010.2	2.032	1.023	0.009139	up	78.284	75.436	57.219	163.696	152.703	196.769	70.313	171.056	_
Solyc01g006950.3	2.039	1.028	0.006146	up	12.999	7.757	13.207	30.285	26.126	26.792	11.321	27.734	RecName: Full=Syntaxin-121; Short=AtSYP121; AltName: Full=Syntaxin-related protein At-Syr1
Solyc02g077340.1	2.043	1.031	0.008053	up	59.806	44.31	66.614	133.623	128.917	161.45	56.91	141.33	RecName: Full=GDSL esterase/lipase At5g45960; AltName: Full=Extracellular lipase At5g45960; Flags: Precursor
Solyc12g007050.1	2.059	1.042	0.01062	up	193.617	205.493	166.715	542.895	339.476	407.475	188.608	429.949	_
Solyc02g087770.3	2.072	1.051	0.001277	up	25.905	19.587	29.575	74.127	72.305	44.779	25.022	63.737	RecName: Full=Aldose 1-epimerase; AltName: Full=Galactose mutarotase
Solyc02g064830.3	2.079	1.056	0.03334	up	15.329	8.667	7.884	31.396	29.316	20.054	10.627	26.922	RecName: Full=Indole-3-acetic acid-amido synthetase GH3.3; AltName: Full=Auxin-responsive GH3-like protein 3; Short=AtGH3-3
Solyc02g072210.1	2.081	1.057	0.02615	up	5.521	3.995	6.503	15.904	12.626	12.684	5.34	13.738	_
Solyc11g071800.2	2.082	1.058	0.04379	up	4.64	3.086	2.391	10.286	8.536	6.942	3.372	8.588	_
Solyc08g007790.3	2.083	1.059	0.006255	up	22.041	22.818	26.043	52.693	51.574	70.757	23.634	58.341	RecName: Full=Hydroxymethylglutaryl-CoA synthase; Short=HMG-CoA synthase; AltName: Full=3-hydroxy-3-methylglutaryl coenzyme A synthase; AltName: Full=Protein EMBRYO
Solyc08g079430.3	2.105	1.074	0.005657	up	16.759	12.371	11.546	43.33	38.801	22.754	13.559	34.962	RecName: Full=Primary amine oxidase; AltName: Full=Amine oxidase
Solyc09g090730.2	2.113	1.079	0.02432	up	14.397	6.423	11.186	29.211	28.097	24.189	10.669	27.166	RecName: Full=Ammonium transporter 1 member 1; AltName: Full=LeAMT1;1
Solyc02g084570.3	2.114	1.08	0.04887	up	3.532	2.109	3.502	7.378	6.233	9.181	3.048	7.597	RecName: Full=Cytochrome P450 84A1; AltName: Full=Ferulate-5-hydroxylase; Short=F5H
Solyc10g011910.3	2.135	1.094	0.0488	up	45.605	33.612	20.33	83.864	79.536	92.085	33.182	85.162	RecName: Full=WRKY transcription factor 22; AltName: Full=WRKY DNA-binding protein 22
Solyc10g050880.1	2.148	1.103	0.005048	up	19.814	17.488	22.512	67.885	60.024	32.352	19.938	53.42	RecName: Full=2-hydroxyisoflavanone dehydratase; AltName: Full=Carboxylesterase HIDM
Solyc09g097870.3	2.152	1.106	0.01511	up	4.661	3.008	6.093	11.922	10.359	11.12	4.587	11.134	RecName: Full=Transcription factor bHLH62; AltName: Full=Basic helix-loop-helix protein 62; Short=AtbHLH62; Short=bHLH 62; AltName: Full=Transcription factor EN 85
Solyc03g097510.1	2.155	1.108	0.0284	up	4.827	3.366	2.591	9.113	8.524	10.145	3.595	9.261	RecName: Full=small auxin-up RNA (SAUR)
Solyc06g051940.3	2.164	1.114	0.02907	up	4.733	4.295	3.542	10.137	10.729	13.819	4.19	11.562	RecName: Full=Protein phosphatase 2C 56; Short=AtPP2C56; AltName: Full=Protein ABSCISIC ACID-INSENSITIVE 1; AltName: Full=Protein phosphatase 2C ABI1; Short=PP2C A
Solyc06g075370.3	2.164	1.114	0.004752	up	3.346	3.821	4.242	12.658	10.606	7.306	3.803	10.19	RecName: Full=Dof zinc finger protein DOF5.3; Short=AtDOF5.3
Solyc06g073180.3	2.172	1.119	0.03163	up	10.016	8.522	15.258	36.215	34.268	17.579	11.265	29.354	RecName: Full=Salt tolerance protein
Solyc02g022850.1	2.175	1.121	0.03072	up	2.02	1.248	1.491	5.006	4.742	2.946	1.586	4.231	RecName: Full=Reticuline oxidase-like protein; Flags: Precursor
Solyc06g074530.1	2.184	1.127	0.008748	up	78.46	57.968	42.272	151.774	152.321	166.077	59.567	156.724	RecName: Full=Arogenate dehydratase/prephenate dehydratase 6, chloroplastic; Short=AtADT6; Short=AtPDT6; Flags: Precursor
Solyc04g015750.3	2.193	1.133	0.0001695	up	7.25	5.891	4.732	17.29	17.269	12.93	5.958	15.83	RecName: Full=Magnesium-chelatase subunit ChlH, chloroplastic; Short=Mg-chelatase subunit H; AltName: Full=ABA-binding protein; AltName: Full=Mg-protoporphyrin IX c
Solyc12g045020.2	2.199	1.137	0.001245	up	41.4	25.023	29.895	82.778	81.63	88.786	32.106	84.398	_
Solyc08g007420.3	2.207	1.142	0.02382	up	2.258	1.751	2.021	6.304	4.385	5.453	2.01	5.381	RecName: Full=L-lactate dehydrogenase B; Short=LDH-B, partial
Solyc10g078550.3	2.218	1.149	0.02295	up	11.269	7.748	11.226	25.916	19.647	33.37	10.081	26.311	_
Solyc03g112030.2	2.221	1.151	0.02474	up	100.978	58.828	50.636	175.543	170.958	210.663	70.147	185.721	RecName: Full=Cytochrome P450 71A2; AltName: Full=CYPLXXIA2; AltName: Full=Cytochrome P-450EG4
Solyc04g050930.3	2.225	1.154	0.001476	up	3.522	3.086	5.113	11.31	10.569	9.534	3.907	10.471	RecName: Full=Violaxanthin de-epoxidase, chloroplastic; Flags: Precursor
Solyc08g006530.3	2.238	1.162	0.01885	up	6.556	4.411	3.222	12.958	12.355	12.919	4.73	12.744	RecName: Full=Zinc finger protein CONSTANS-LIKE 4
Solyc06g054260.1	2.241	1.164	0.0208	up	26.578	20.496	18.74	52.331	52.19	75.106	21.938	59.876	RecName: Full=Photosystem I reaction center subunit II, chloroplastic; AltName: Full=Photosystem I 20 kDa subunit; Short=PSI-D; Flags: Precursor
Solyc12g005730.2	2.245	1.167	0.01942	up	11.259	6.703	10.725	33.393	30.646	15.169	9.562	26.403	_
Solyc06g076300.3	2.278	1.188	0.001971	up	1.678	1.257	1.751	4.145	3.979	4.574	1.562	4.233	_
Solyc09g082270.3	2.285	1.192	0.01062	up	17.795	10.146	11.486	34.454	35.487	39.958	13.142	36.633	_
Solyc01g097270.3	2.285	1.192	0.03981	up	296.241	108.613	166.515	522.322	557.759	496.904	190.456	525.662	RecName: Full=Wound-induced protein WIN2; Flags: Precursor
Solyc12g056980.1	2.285	1.192	0.001925	up	12.429	7.206	8.114	28.637	27.9	21.286	9.25	25.941	_
Solyc10g083330.1	2.293	1.197	0.02011	up	6.536	2.979	5.243	14.693	15.065	11.516	4.919	13.758	_
Solyc12g005720.1	2.294	1.198	0.007823	up	8.814	6.084	5.093	21.983	20.176	15.03	6.664	19.063	_
Solyc09g007910.3	2.304	1.204	0.0132	up	26.505	15.321	27.255	56.55	55.32	75.492	23.028	62.454	RecName: Full=Phenylalanine ammonia-lyase; Short=PAL
Solyc10g052880.1	2.305	1.205	0.012	up	44.704	29.443	33.267	88.183	78.636	124.962	35.805	97.26	RecName: Full=Probably inactive leucine-rich repeat receptor-like protein kinase IMK2; AltName: Full=Protein INFLORESCENCE MERISTEM RECEPTOR-LIKE KINASE 2; Flags: P
Solyc10g085030.1	2.307	1.206	0.02532	up	16.417	9.653	22.431	41.782	50.367	45.089	16.167	45.746	_
Solyc12g014430.2	2.312	1.209	0.01581	up	0.829	0.687	1.281	2.871	2.427	2.442	0.932	2.58	_
Solyc02g092580.3	2.32	1.214	0.04579	up	16.417	14.577	13.947	62.268	49.837	19.69	14.98	43.932	RecName: Full=Peroxidase 51; Short=Atperox P51; AltName: Full=ATP37; Flags: Precursor
Solyc12g096500.2	2.334	1.223	0.008006	up	2.734	4.372	5.243	12.958	10.864	11.184	4.116	11.669	_
Solyc01g105050.3	2.349	1.232	0.03577	up	2.911	1.625	1.161	5.792	5.925	4.467	1.899	5.395	RecName: Full=Chlorophyll a-b binding protein CP24 10B, chloroplastic; Short=CAB-10B; Short=LHCP; Flags: Precursor
Solyc08g008280.3	2.351	1.233	0.01631	up	31.425	17.101	25.093	57.624	59.371	86.515	24.54	67.837	RecName: Full=Probable WRKY transcription factor 53; AltName: Full=WRKY DNA-binding protein 53
Solyc12g099140.2	2.355	1.236	0.03673	up	5.127	2.641	2.921	13.158	11.542	6.428	3.563	10.376	_
Solyc09g008560.3	2.365	1.242	0.001986	up	1.647	1.528	1.781	5.68	5.444	3.267	1.652	4.797	RecName: Full=Protein SRG1; Short=AtSRG1; AltName: Full=Protein SENESCENCE-RELATED GENE 1
Solyc03g122190.3	2.37	1.245	0.01257	up	1.595	1.838	1.981	6.379	6.356	2.935	1.805	5.223	RecName: Full=Jasmonate ZIM-domain
Solyc09g014520.3	2.377	1.249	0.0228	up	21.171	16.975	9.125	45.49	44.43	47.071	15.757	45.664	RecName: Full=Chlorophyll a-b binding protein CP29.1, chloroplastic; AltName: Full=LHCB4.1; AltName: Full=LHCII protein 4.1; Flags: Precursor
Solyc03g113540.3	2.393	1.259	0.02959	up	1.927	1.122	1.171	4.881	4.89	2.614	1.407	4.128	RecName: Full=Dynein light chain, cytoplasmic; AltName: Full=Dynein light chain LC8-type 2
Solyc07g005390.3	2.397	1.261	0.02812	up	1.709	2.022	1.201	4.032	4.558	5.571	1.644	4.72	RecName: Full=NADP-dependent glyceraldehyde-3-phosphate dehydrogenase; AltName: Full=Glyceraldehyde-3-phosphate dehydrogenase
Solyc05g009650.3	2.397	1.261	0.04034	up	23.698	16.085	8.444	55.864	44.923	40.226	16.076	47.004	_
Solyc07g042170.3	2.412	1.27	0.03277	up	9.332	7.003	10.575	21.122	19.634	35.502	8.97	25.419	RecName: Full=Protein TIFY 3B; AltName: Full=Jasmonate ZIM domain-containing protein 12
Solyc02g071130.3	2.417	1.273	3.34e-06	up	34.771	22.276	32.106	90.68	95.425	77.463	29.718	87.856	RecName: Full=Probable WRKY transcription factor 71; AltName: Full=WRKY DNA-binding protein 71
Solyc08g080650.3	2.417	1.273	1.25e-05	up	1661.11	997.616	1538.48	4518.2	4539.59	3458.14	1399.07	4171.98	RecName: Full=Osmotin-like protein OSML13; AltName: Full=PA13; Flags: Precursor
Solyc12g009220.2	2.422	1.276	0.02011	up	1.771	0.89	1.801	4.394	3.905	4.456	1.487	4.252	RecName: Full=Jasmonate ZIM-domain
Solyc04g074700.3	2.442	1.288	0.04695	up	2.579	1.219	1.401	4.457	4.89	5.699	1.733	5.015	RecName: Full=Homeobox-leucine zipper protein ATHB-6; AltName: Full=HD-ZIP protein ATHB-6; AltName: Full=Homeodomain transcription factor ATHB-6
Solyc07g052070.2	2.454	1.295	0.0129	up	0.829	0.555	0.5	1.972	1.7	1.596	0.595	1.756	RecName: Full=Cytochrome P450 CYP72A219; AltName: Full=Cytochrome P450 CYP72A129
Solyc04g072375.1	2.461	1.299	0.008716	up	12.388	7.525	7.034	30.709	27.062	26.342	8.982	28.038	RecName: Full=RING-H2 finger protein ATL51
Solyc08g006930.3	2.466	1.302	0.012	up	10.627	10.427	8.364	22.246	30.351	35.587	9.806	29.395	RecName: Full=Photosystem I reaction center subunit psaK, chloroplastic; AltName: Full=PSI-K; AltName: Full=Photosystem I subunit X; Flags: Precursor
Solyc11g018805.1	2.467	1.303	0.01093	up	36.045	19.44	20.76	96.125	86.16	49.28	25.415	77.19	RecName: Full=Peroxidase 43; Short=Atperox P43; Flags: Precursor
Solyc12g056360.1	2.488	1.315	0.02842	up	10.213	5.542	4.272	21.659	20.965	19.015	6.676	20.546	_
Solyc01g065500.3	2.498	1.321	0.001174	up	1.326	1.132	0.9	3.146	3.313	3.557	1.119	3.339	RecName: Full=Extended synaptotagmin-3; Short=E-Syt3; AltName: Full=Chr3Syt
Solyc04g007580.1	2.498	1.321	1.39e-06	up	103.992	87.159	88.165	278.494	291.474	308.212	93.105	292.727	_
Solyc03g034375.1	2.502	1.323	0.001349	up	548.887	363.455	409.409	2160.31	1712.93	953.089	440.584	1608.78	RecName: Full=Probable non-specific lipid-transfer protein AKCS9; Short=LTP; Flags: Precursor
Solyc01g110925.1	2.505	1.325	0.01326	up	1.201	1.306	1.851	4.407	4.705	4.156	1.453	4.423	_
Solyc04g056340.3	2.509	1.327	0.004002	up	7.572	4.024	4.552	11.984	13.636	18.211	5.383	14.61	RecName: Full=Probable tyrosine-protein phosphatase At1g05000
Solyc11g068710.2	2.514	1.33	0.02866	up	49.189	29.956	17.879	96.86	94.489	104.973	32.341	98.774	_
Solyc10g081955.1	2.519	1.333	0.0002878	up	6.971	8.077	11.006	27.913	28.084	25.367	8.685	27.121	_
Solyc02g079950.3	2.525	1.336	0.02628	up	24.993	21.55	9.265	61.644	62.451	48.689	18.603	57.595	RecName: Full=Oxygen-evolving enhancer protein 3, chloroplastic; Short=OEE3; AltName: Full=16 kDa subunit of oxygen evolving system of photosystem II; AltName: Full=O
Solyc04g075000.1	2.526	1.337	0.03364	up	4.775	2.012	2.311	9.175	8.29	9.941	3.033	9.135	RecName: Full=Serine/threonine-protein kinase-like protein At1g28390; AltName: Full=CRINKLY 4-related kinase
Solyc10g078530.2	2.537	1.343	0.03511	up	1.875	1.519	0.87	5.405	3.313	4.403	1.421	4.374	_
Solyc07g054220.1	2.542	1.346	1.25e-06	up	7.447	7.042	7.824	21.347	22.874	24.018	7.438	22.746	RecName: Full=Ethylene-responsive transcription factor ERF053
Solyc03g083480.3	2.554	1.353	0.03481	up	11.362	5.542	4.212	21.409	21.125	22.443	7.039	21.659	_
Solyc09g075820.3	2.554	1.353	0.01247	up	19.566	9.953	23.652	48.761	48.101	63.076	17.724	53.313	RecName: Full=Sugar transport protein 13; AltName: Full=Hexose transporter 13; AltName: Full=Multicopy suppressor of snf4 deficiency protein 1
Solyc01g065510.2	2.572	1.363	0.00224	up	3.542	2.67	3.282	10.236	8.635	10.873	3.165	9.915	RecName: Full=Leucine-rich repeat extensin-like protein 6; Short=AtLRX6; Short=LRR/EXTENSIN6; AltName: Full=Cell wall hydroxyproline-rich glycoprotein; Flags: Precu
Solyc01g059965.1	2.59	1.373	0.006682	up	573.311	259.224	282.845	1212.41	1023.86	1209.37	371.793	1148.55	RecName: Full=Glucan endo-1,3-beta-glucosidase B; AltName: Full=(1-)3)-beta-glucan endohydrolase B; Short=(1-)3)-beta-glucanase B; AltName: Full=Basic beta-1,3-glucan
Solyc01g109090.2	2.592	1.374	0.005408	up	33.58	30.294	19.57	131.002	96.879	58.994	27.815	95.625	_
Solyc04g054950.3	2.592	1.374	0.00224	up	34.294	17.285	26.564	76.461	71.751	93.596	26.048	80.603	RecName: Full=Tropinone reductase homolog; AltName: Full=P29X
Solyc07g056670.3	2.594	1.375	2.25e-07	up	19.607	13.309	20.27	59.821	54.407	52.427	17.729	55.552	RecName: Full=Gibberellin 2-beta-dioxygenase 1; AltName: Full=GA 2-oxidase 1; AltName: Full=Gibberellin 2-beta-hydroxylase 1; AltName: Full=Gibberellin 2-oxidase 1;
Solyc03g117490.3	2.61	1.384	9.81e-08	up	3.221	2.534	3.022	9.775	8.844	8.881	2.926	9.167	RecName: Full=Glycerol kinase; Short=Glycerokinase; AltName: Full=ATP:glycerol 3-phosphotransferase; AltName: Full=Protein GLYCEROL INSENSITIVE 1; AltName: Full=Pro
Solyc10g083290.4	2.615	1.387	0.01148	up	9.187	3.917	5.593	19.15	16.247	22.379	6.232	19.259	_
Solyc10g007690.3	2.617	1.388	0.01581	up	9.829	8.376	3.962	26.415	21.728	22.936	7.389	23.693	RecName: Full=Chlorophyll a-b binding protein 8, chloroplastic; AltName: Full=LHCI type III CAB-8; Flags: Precursor
Solyc07g065090.2	2.621	1.39	0.0007658	up	18.126	11.094	13.557	40.484	40.328	52.77	14.259	44.527	RecName: Full=Polygalacturonase inhibitor; AltName: Full=Polygalacturonase-inhibiting protein; Short=PGIG; Flags: Precursor
Solyc07g047850.3	2.634	1.397	0.001785	up	13.921	9.189	7.594	36.364	35.647	20.022	10.235	30.678	RecName: Full=Chlorophyll a-b binding protein 4, chloroplastic; AltName: Full=LHCII type I CAB-4; Short=LHCP; Flags: Precursor
Solyc10g077040.2	2.646	1.404	0.001619	up	6.733	4.372	3.442	16.266	13.513	16.251	4.849	15.343	_
Solyc04g016470.3	2.648	1.405	0.02382	up	545.977	477.485	360.585	1995.31	1981.05	632.814	461.349	1536.39	RecName: Full=Glucan endo-1,3-beta-glucosidase, acidic isoform PR-Q'; AltName: Full=(1-)3)-beta-glucan endohydrolase; Short=(1-)3)-beta-glucanase; AltName: Full=Beta-
Solyc09g011590.3	2.652	1.407	0.006417	up	19.607	8.647	15.738	40.671	39.934	50.36	14.664	43.655	RecName: Full=Probable glutathione S-transferase; AltName: Full=Pathogenesis-related protein 1
Solyc02g090980.1	2.652	1.407	0.007691	up	5.2	4.304	3.822	11.622	12.071	18.276	4.442	13.99	RecName: Full=Mitogen-activated protein kinase kinase kinase A; AltName: Full=MAPK/ERK kinase 1; Short=MEK kinase 1; Short=MEKK 1; AltName: Full=MAPK/ERK kinase A;
Solyc08g016720.1	2.654	1.408	0.0003143	up	4.402	4.217	2.651	14.706	12.416	9.609	3.757	12.244	RecName: Full=Probable 9-cis-epoxycarotenoid dioxygenase NCED5, chloroplastic; Short=AtNCED5; Flags: Precursor
Solyc02g090970.1	2.654	1.408	0.04227	up	13.424	9.721	9.525	26.453	23.096	52.01	10.89	33.853	RecName: Full=Mitogen-activated protein kinase kinase kinase YODA; AltName: Full=YODA MAPKK kinase
Solyc08g082090.1	2.659	1.411	0.006249	up	163.745	134.003	71.226	418.073	392.233	435.424	122.991	415.243	_
Solyc02g070790.3	2.709	1.438	0.01825	up	1.005	0.725	0.83	2.359	2.402	3.396	0.853	2.719	RecName: Full=3-oxoacyl-
Solyc07g005100.3	2.717	1.442	3.57e-05	up	192.685	106.359	174.489	527.615	475.538	536.519	157.844	513.224	RecName: Full=Probable endochitinase
Solyc08g078090.1	2.719	1.443	9.18e-05	up	6.836	4.817	3.852	17.115	17.023	16.68	5.168	16.939	RecName: Full=Phospholipase A1-Ibeta2, chloroplastic; Flags: Precursor
Solyc03g115980.1	2.745	1.457	4.31e-06	up	10.482	10.359	7.124	35.004	34.995	24.371	9.322	31.457	RecName: Full=Geranylgeranyl diphosphate reductase, chloroplastic; AltName: Full=Geranylgeranyl reductase; Flags: Precursor
Solyc04g083140.2	2.789	1.48	0.0007786	up	87.502	54.234	55.618	199.212	182.746	269.743	65.785	217.234	RecName: Full=Premnaspirodiene oxygenase; Short=HPO; AltName: Full=Cytochrome P450 71D55
Solyc04g054257.1	2.813	1.492	0.02427	up	0.87	1.528	1.801	6.279	5.715	2.721	1.4	4.905	RecName: Full=Cytochrome P450 CYP736A12
Solyc11g072920.2	2.826	1.499	0.0001609	up	8.038	5.987	6.443	27.289	27.776	18.576	6.823	24.547	RecName: Full=Peroxidase 43; Short=Atperox P43; Flags: Precursor
Solyc01g087820.2	2.856	1.514	0.009967	up	1.854	2.128	2.171	10.037	8.696	3.203	2.051	7.312	RecName: Full=Subtilisin-like protease; AltName: Full=Cucumisin-like serine protease; Flags: Precursor
Solyc01g098140.3	2.858	1.515	0.0001262	up	1.212	0.9	1.331	4.419	4.631	2.925	1.148	3.992	RecName: Full=Carboxylesterase 1; Short=AeCXE1
Solyc06g072740.1	2.866	1.519	2.61e-05	up	3.594	2.882	3.782	13.657	13.907	8.709	3.419	12.091	RecName: Full=Inositol-tetrakisphosphate 1-kinase 1; AltName: Full=Inositol 1,3,4-trisphosphate 5/6-kinase 1; Short=AtItpk-1; Short=Inositol-triphosphate 5/6-kinas
Solyc05g009660.3	2.874	1.523	2.35e-11	up	56.16	43.033	44.363	176.329	158.763	164.181	47.852	166.424	RecName: Full=TGACG sequence-specific bindingTGACG sequence-specific binding protein; AltName: Full=bZIP transcription factor 46; Short=AtbZIP46
Solyc06g076170.3	2.886	1.529	0.0003382	up	5.894	4.556	3.282	16.154	13.747	17.826	4.577	15.909	RecName: Full=Glucan endo-1,3-beta-D-glucosidase; AltName: Full=Major pollen allergen Ole e 9; AltName: Allergen=Ole e 9; Flags: Precursor
Solyc08g082110.3	2.896	1.534	8.27e-05	up	7.83	4.536	8.054	26.265	19.795	24.618	6.807	23.559	RecName: Full=Probable WRKY transcription factor 53; AltName: Full=WRKY DNA-binding protein 53
Solyc07g053600.3	2.914	1.543	0.0002767	up	3.128	1.905	1.771	7.365	7.391	8.741	2.268	7.832	RecName: Full=Receptor-like protein kinase HSL1; AltName: Full=Protein HAESA-LIKE1; Flags: Precursor
Solyc02g068680.1	2.942	1.557	0.006546	up	7.955	4.101	7.034	18.014	17.947	29.813	6.363	21.925	_
Solyc09g091000.3	2.955	1.563	6.69e-10	up	1508.38	1069.75	1394.86	5823.49	5548.75	3566.27	1324.33	4979.5	RecName: Full=Pathogenesis-related protein STH-2
Solyc09g089930.2	2.969	1.57	0.02011	up	2.703	3.521	3.042	13.607	12.971	5.153	3.089	10.577	RecName: Full=Ethylene-responsive transcription factor 1B; Short=AtERF1B; AltName: Full=Ethylene-responsive element-binding factor 1B; Short=EREBP-1B
Solyc06g076160.3	2.975	1.573	0.03332	up	8.587	4.256	2.901	24.018	21.975	13.701	5.248	19.898	RecName: Full=Cytochrome P450 71A9; AltName: Full=Cytochrome P450 CP1
Solyc03g116700.3	2.979	1.575	0.002256	up	76.554	31.687	57.249	184.906	174.407	235.677	55.163	198.33	RecName: Full=Cucumber peeling cupredoxin; Short=CPC; AltName: Full=Stellacyanin
Solyc02g085745.1	2.979	1.575	0.02642	up	2.206	1.374	0.87	5.318	4.028	6.31	1.483	5.219	RecName: Full=Rhomboid protease GluP; AltName: Full=Intramembrane serine protease
Solyc06g069385.1	2.99	1.58	1.09e-06	up	2.672	3.647	3.762	13.42	12.342	11.109	3.36	12.29	RecName: Full=Dof zinc finger protein DOF5.4; Short=AtDOF5.4; AltName: Full=OBF-binding protein 4
Solyc06g071690.3	2.99	1.58	0.003585	up	3.698	1.741	2.071	11.847	7.538	8.259	2.503	9.215	RecName: Full=Transcription factor MYB86; AltName: Full=Myb homolog 4; Short=AtMyb4; AltName: Full=Myb-related protein 86; Short=AtMYB86
Solyc08g068700.1	2.998	1.584	0.02427	up	22.145	12.178	9.535	46.638	37.335	73.435	14.619	52.469	RecName: Full=Tyramine N-feruloyltransferase 4/11; AltName: Full=Hydroxycinnamoyl-CoA: tyramine N-hydroxycinnamoyltransferase
Solyc10g055810.2	3.008	1.589	5.86e-11	up	1298.73	871.293	1348.6	4546.49	4503.49	3823.67	1172.88	4291.22	RecName: Full=Basic 30 kDa endochitinase; Flags: Precursor
Solyc07g032640.2	3.019	1.594	0.004397	up	19.721	14.19	7.234	49.16	47.189	53.863	13.715	50.071	RecName: Full=Oxygen-evolving enhancer protein 1, chloroplastic; Short=OEE1; AltName: Full=33 kDa subunit of oxygen evolving system of photosystem II; AltName: Full=3
Solyc09g090970.3	3.029	1.599	0.02116	up	148.292	90.815	39.87	285.261	358.015	351.802	92.992	331.693	RecName: Full=Pathogenesis-related protein STH-2
Solyc10g018300.2	3.074	1.62	0.0287	up	1.999	1.838	0.75	4.968	4.422	7.327	1.529	5.572	RecName: Full=Transketolase, chloroplastic; Short=TK; Flags: Precursor
Solyc12g100250.2	3.097	1.631	0.02026	up	273.216	132.901	82.202	497.418	542.349	783.648	162.773	607.805	_
Solyc04g008100.2	3.097	1.631	0.001444	up	99.828	65.619	45.753	240.919	218.898	319.985	70.4	259.934	RecName: Full=U-box domain-containing protein 21; AltName: Full=Plant U-box protein 21
Solyc09g005830.1	3.104	1.634	0.01014	up	1.823	0.812	2.451	5.867	5.666	7.07	1.695	6.201	_
Solyc01g005500.3	3.11	1.637	2.99e-06	up	10.886	6.132	11.316	39.785	32.802	33.691	9.445	35.426	RecName: Full=Secoisolariciresinol dehydrogenase
Solyc03g034220.3	3.112	1.638	0.0003143	up	2.942	4.575	2.681	12.683	14.88	11.655	3.399	13.073	RecName: Full=Ribulose bisphosphate carboxylase small chain 2A, chloroplastic; Short=RuBisCO small subunit 2A; AltName: Full=LESS 5; Flags: Precursor
Solyc08g080750.3	3.169	1.664	0.0001897	up	3.667	4.73	6.193	18.451	15.373	21.35	4.863	18.391	RecName: Full=Protein LURP-one-related 4
Solyc03g082520.1	3.173	1.666	0.0003515	up	0.86	0.532	0.5	2.484	2.377	2.357	0.631	2.406	RecName: Full=small auxin-up RNA (SAUR)
Solyc12g099260.2	3.238	1.695	0.04687	up	3.532	3.066	5.393	9.7	8.659	25.957	3.997	14.772	_
Solyc08g082210.3	3.285	1.716	0.02222	up	10.741	4.353	6.023	40.646	35.13	12.909	7.039	29.562	RecName: Full=Ethylene-responsive transcription factor ERF061
Solyc10g055410.2	3.31	1.727	0.002696	up	7.302	3.24	2.711	19.637	16.752	16.722	4.418	17.704	RecName: Full=Myb-related protein 308
Solyc04g024780.1	3.354	1.746	0.01705	up	4.889	2.176	1.651	12.708	8.819	13.594	2.905	11.707	_
Solyc04g071580.3	3.364	1.75	6.88e-10	up	94.929	61.866	76.549	325.32	304.617	340.682	77.781	323.54	RecName: Full=Abscisic stress-ripening protein 2
Solyc03g006970.1	3.368	1.752	0.008856	up	1.236	0.783	0.57	2.959	3.375	3.996	0.863	3.443	RecName: Full=Subtilisin-like protease; AltName: Full=Cucumisin-like serine protease; Flags: Precursor
Solyc12g049030.1	3.394	1.763	0.0134	up	55	25.516	18.209	105.411	109.677	180.132	32.908	131.74	_
Solyc02g079510.3	3.437	1.781	0.01931	up	0.559	0.764	0.52	3.196	1.946	2.303	0.581	2.482	RecName: Full=Suberization-associated anionic peroxidase 2; AltName: Full=TMP2; Flags: Precursor
Solyc08g068710.1	3.475	1.797	0.01526	up	1.471	1.17	0.88	6.217	3.917	5.088	1.174	5.074	RecName: Full=Tyramine N-feruloyltransferase 4/11; AltName: Full=Hydroxycinnamoyl-CoA: tyramine N-hydroxycinnamoyltransferase
Solyc08g068870.3	3.494	1.805	0.0001511	up	1.46	0.822	1.111	5.231	3.954	4.981	1.131	4.722	RecName: Full=Aspartic proteinase nepenthesin-2; AltName: Full=Nepenthesin-II; Flags: Precursor
Solyc06g082940.3	3.519	1.815	0.002326	up	2.393	4.749	1.981	13.208	14.498	12.073	3.041	13.26	RecName: Full=Photosystem I reaction center subunit XI, chloroplastic; Short=PSI-L; AltName: Full=PSI subunit V; Flags: Precursor
Solyc01g109460.3	3.523	1.817	0.0001091	up	65.368	24.501	35.798	196.066	189.373	148.691	41.889	178.043	RecName: Full=Polyol transporter 5; AltName: Full=Protein POLYOL TRANSPORTER 5; Short=AtPLT5; AltName: Full=Sugar-proton symporter PLT5
Solyc01g107080.3	3.523	1.817	0.01566	up	1.854	0.571	2.661	6.629	7.637	6.717	1.695	6.994	RecName: Full=BAHD acyltransferase DCR; AltName: Full=Protein DEFECTIVE IN CUTICULAR RIDGES; AltName: Full=Protein PERMEABLE LEAVES 3
Solyc01g106610.2	3.528	1.819	0.008298	up	2.755	0.871	1.381	6.766	8.327	6.299	1.669	7.131	RecName: Full=Pathogenesis-related protein 1A1; Short=PR-1A1; Flags: Precursor
Solyc02g092760.3	3.548	1.827	0.003441	up	0.58	0.929	0.66	2.734	2.821	3.707	0.723	3.087	RecName: Full=Probable esterase KAI2; AltName: Full=Protein DWARF-14-like; Short=Protein D14-like; AltName: Full=Protein HYPOSENSITIVE TO LIGHT; AltName: Full=Prote
Solyc10g006230.3	3.55	1.828	0.01405	up	11.362	11.588	3.272	33.343	34.465	44.629	8.741	37.479	RecName: Full=Chlorophyll a-b binding protein 7, chloroplastic; AltName: Full=LHCI type II CAB-7; Flags: Precursor
Solyc05g054380.2	3.55	1.828	0.001432	up	16.805	15.663	16.807	69.665	67.98	72.031	16.445	69.912	RecName: Full=Pathogenesis-related protein 10
Solyc08g061130.3	3.583	1.841	0.002715	up	4.288	5.726	6.703	32.794	32.26	9.748	5.572	24.934	RecName: Full=Transcription factor HY5; AltName: Full=LeHY5; AltName: Full=tHY5
Solyc02g090490.3	3.585	1.842	0.01036	up	4.361	2.95	2.821	10.586	8.77	22.818	3.377	14.058	RecName: Full=Patatin-like protein 1
Solyc12g014420.2	3.61	1.852	1.38e-05	up	0.943	1.064	0.67	3.982	3.88	3.846	0.892	3.903	_
Solyc01g007010.2	3.633	1.861	0.04463	up	1.512	0.783	0.5	3.358	2.771	5.753	0.932	3.961	RecName: Full=E3 ubiquitin-protein ligase PUB23; AltName: Full=Plant U-box protein 23; AltName: Full=U-box domain-containing protein 23
Solyc01g109250.2	3.676	1.878	5.21e-11	up	7.551	7.274	9.605	42.943	31.115	35.737	8.143	36.598	_
Solyc07g005380.3	3.691	1.884	2.3e-05	up	26.454	12.719	17.239	76.137	74.3	98.984	18.804	83.14	_
Solyc01g007020.3	3.753	1.908	0.02827	up	5.355	3.937	1.061	15.792	14.596	17.301	3.451	15.896	RecName: Full=E3 ubiquitin-protein ligase PUB22; AltName: Full=Plant U-box protein 22; AltName: Full=U-box domain-containing protein 22
Solyc03g005570.3	3.771	1.915	9.62e-06	up	1.595	1.635	1.131	7.515	5.444	6.985	1.454	6.648	RecName: Full=Myb-related protein Myb4; AltName: Full=OsMyb4; AltName: Full=Transcription factor RLTR1
Solyc11g071470.1	3.832	1.938	0.003156	up	1.315	0.535	0.75	4.157	4.459	3.01	0.833	3.875	_
Solyc07g017600.3	3.834	1.939	1.38e-05	up	0.584	0.507	0.56	2.996	2.562	2.132	0.55	2.563	RecName: Full=Probable pectinesterase/pectinesterase inhibitor 44; Includes: RecName: Full=Pectinesterase inhibitor 44; AltName: Full=Pectin methylesterase inhibi
Solyc01g095620.3	3.861	1.949	0.0002847	up	16.883	7.622	7.084	43.418	44.689	56.745	10.53	48.284	RecName: Full=Hydroquinone glucosyltransferase; AltName: Full=Arbutin synthase
Solyc01g089880.3	3.923	1.972	0.03839	up	1.885	0.658	0.63	6.779	5.629	3.203	1.058	5.204	_
Solyc04g010250.3	3.967	1.988	0.001476	up	12.709	5.571	4.392	34.092	29.452	43.418	7.557	35.654	_
Solyc12g044983.1	3.972	1.99	0.006627	up	33.155	14.876	8.344	74.726	80.927	110.854	18.792	88.836	_
Solyc01g105630.3	4	2	4.15e-07	up	7.53	3.492	5.223	28.712	24.254	24.178	5.415	25.715	RecName: Full=Calmodulin; Short=CaM
Solyc01g087850.2	4.028	2.01	2.99e-06	up	5.552	4.014	4.202	19.25	16.654	29.117	4.589	21.674	RecName: Full=Subtilisin-like protease; AltName: Full=Cucumisin-like serine protease; Flags: Precursor
Solyc10g055820.2	4.081	2.029	4.87e-06	up	13.506	6.442	9.955	38.874	43.826	63.858	9.968	48.853	RecName: Full=Endochitinase 3; Flags: Precursor
Solyc11g013110.2	4.147	2.052	0.001185	up	1.015	1.344	0.53	4.719	4.976	4.403	0.93	4.699	_
Solyc09g091670.3	4.24	2.084	0.001285	up	17.277	6.809	5.863	43.68	43.666	61.619	9.983	49.655	RecName: Full=Pleiotropic drug resistance protein 1; AltName: Full=NpPDR1
Solyc05g055030.2	4.246	2.086	6.68e-07	up	1.429	1.122	1.481	7.89	5.789	7.06	1.344	6.913	RecName: Full=Myb-related protein Myb4; AltName: Full=OsMyb4; AltName: Full=Transcription factor RLTR1
Solyc01g111070.3	4.246	2.086	5.05e-07	up	1.139	0.677	1.131	5.705	6.233	3.289	0.982	5.076	RecName: Full=Chalcone synthase A; AltName: Full=Naringenin-chalcone synthase A
Solyc10g083210.2	4.275	2.096	0.008044	up	0.539	0.513	0.65	2.047	1.959	4.435	0.567	2.814	_
Solyc12g044987.1	4.278	2.097	0.003713	up	32.285	13.706	10.105	81.293	65.087	135.654	18.699	94.011	_
Solyc02g070110.1	4.353	2.122	0.03452	up	0.86	0.535	0.51	1.935	1.761	4.853	0.568	2.85	RecName: Full=Tetrahydrocannabinolic acid synthase; Short=THCAS; AltName: Full=Delta(1)-tetrahydrocannabinolic acid synthase; AltName: Full=THCA synthase; Flags: P
Solyc12g099650.2	4.368	2.127	0.03698	up	2.051	6.2	4.832	20.223	22.443	32.052	4.361	24.906	_
Solyc12g044950.2	4.38	2.131	5.58e-06	up	5.345	2.457	3.862	15.817	15.73	24.125	3.888	18.557	_
Solyc06g074820.3	4.38	2.131	0.00012	up	2.165	1.867	1.271	7.103	8.77	11.805	1.768	9.226	RecName: Full=Aquaporin TIP1-1; AltName: Full=Tonoplast intrinsic protein 1-1; AltName: Full=ZmTIP1-1; AltName: Full=ZmTIP1;1; Short=ZmTIP1
Solyc07g064410.1	4.541	2.183	0.003795	up	0.932	0.687	1.391	7.977	6.713	2.485	1.003	5.725	RecName: Full=Fatty acid desaturase 4, chloroplastic; AltName: Full=Fatty acid desaturase A; Flags: Precursor
Solyc03g098680.3	4.547	2.185	2.58e-12	up	8.193	5.233	5.953	41.583	41.831	24.371	6.46	35.928	_
Solyc06g062330.2	4.582	2.196	0.002936	up	1.315	0.539	0.55	4.507	4.397	3.278	0.735	4.061	RecName: Full=Zeatin O-glucosyltransferase; AltName: Full=Trans-zeatin O-beta-D-glucosyltransferase
Solyc01g101190.3	4.734	2.243	0.0003509	up	21.213	10.282	16.408	60.82	60.96	139.189	15.968	86.99	RecName: Full=Viridiflorene synthase; Short=SlTPS31
Solyc02g082920.3	4.773	2.255	1.49e-06	up	34.315	62.127	64.863	395.128	401.927	171.626	53.768	322.894	RecName: Full=Acidic 26 kDa endochitinase; Flags: Precursor
Solyc01g106630.2	4.783	2.258	0.03134	up	32.068	4.237	39.13	99.568	131.861	189.795	25.145	140.408	_
Solyc03g119370.2	4.813	2.267	4.11e-05	up	0.953	0.89	1.051	5.368	3.621	6.738	0.965	5.242	RecName: Full=Transcription factor MYB108; AltName: Full=Myb-related protein 108; Short=AtMYB108; AltName: Full=Protein BOTRYTIS-SUSCEPTIBLE 1
Solyc04g057830.1	5.025	2.329	0.03626	up	1.937	0.89	0.86	6.242	3.683	12.062	1.229	7.329	_
Solyc01g101210.4	5.187	2.375	0.01261	up	4.547	2.147	2.151	9.051	8.918	33.798	2.948	17.256	RecName: Full=Vetispiradiene synthase 1
Solyc09g075750.1	5.195	2.377	2.06e-06	up	1.46	1.325	1.521	7.19	8.031	11.377	1.435	8.866	RecName: Full=Probable membrane-associated kinase regulator 1
Solyc01g101180.3	5.374	2.426	0.0008561	up	24.672	8.879	12.696	67.636	60.936	156.661	15.416	95.078	RecName: Full=Viridiflorene synthase; Short=SlTPS31
Solyc10g079380.2	5.408	2.435	0.03129	up	0.186	0.629	0.4	4.244	3.548	0.653	0.405	2.815	_
Solyc01g101170.3	5.472	2.452	0.03014	up	9.394	5.068	5.343	17.127	13.488	89.632	6.602	40.082	RecName: Full=Viridiflorene synthase; Short=SlTPS31
Solyc02g079280.3	5.583	2.481	1.23e-05	up	0.883	0.609	1.051	5.281	5.1	3.589	0.681	4.657	RecName: Full=Transcription factor MYB39; AltName: Full=Myb-related protein 39; Short=AtMYB39
Solyc07g045530.2	5.816	2.54	0.009011	up	1.895	0.648	0.56	6.504	6.479	7.617	0.968	6.867	_
Solyc10g055200.1	6.071	2.602	1.76e-12	up	10.813	7.177	9.555	92.94	78.193	42.733	9.182	71.289	RecName: Full=Dirigent protein 23; Short=AtDIR23; Flags: Precursor
Solyc10g079860.2	6.08	2.604	1.32e-13	up	50.39	47.744	55.939	482.899	477.238	206.41	51.358	388.849	_
Solyc01g109140.3	6.08	2.604	3.34e-06	up	20.467	9.295	8.825	76.649	70.383	127.748	12.862	91.593	RecName: Full=9-divinyl ether synthase; Short=LeDES; AltName: Full=Colneleate synthase; AltName: Full=Cytochrome P450 74D1
Solyc01g091250.3	6.294	2.654	0.0005569	up	1.129	1.035	0.52	9.487	8.376	2.732	0.861	6.865	_
Solyc09g007760.3	7.052	2.818	6.62e-06	up	1.678	2.36	0.76	12.459	10.864	17.472	1.599	13.598	RecName: Full=Aquaporin PIP2-1; AltName: Full=Plasma membrane intrinsic protein 2-1; Short=AtPIP2;1; AltName: Full=Plasma membrane intrinsic protein 2a; Short=PIP2a
Solyc10g078220.2	7.067	2.821	0.009724	up	2.567	0.781	0.68	6.204	8.093	7.66	1.343	7.319	RecName: Full=coumaric acid-3-hydroxylase
Solyc01g105030.3	7.22	2.852	2.24e-09	up	3.056	2.882	1.111	21.909	22.246	18.747	2.35	20.967	RecName: Full=Chlorophyll a-b binding protein CP24 10A, chloroplastic; Short=CAB-10A; Short=LHCP; Flags: Precursor
Solyc10g005460.3	7.275	2.863	2.99e-06	up	1.222	0.535	0.96	6.279	5.876	10.027	0.872	7.394	RecName: Full=Transcription factor MYB32; AltName: Full=Myb-related protein 32; Short=AtMYB32
Solyc08g036660.3	7.418	2.891	0.003732	up	1.243	0.539	0.58	8.926	4.065	5.292	0.654	6.094	_
Solyc09g011550.2	7.611	2.928	7.5e-08	up	2.496	1.76	0.79	14.194	15.717	16.744	1.682	15.552	RecName: Full=Probable glutathione S-transferase; AltName: Full=Auxin-induced protein PCNT103
Solyc11g005480.2	8.061	3.011	2.34e-08	up	15.34	5.794	5.333	113.088	92.752	55.577	8.822	87.139	_
Solyc03g117270.1	8.208	3.037	9.71e-13	up	1.098	0.503	1.051	9.987	9.743	6.706	0.884	8.812	RecName: Full=F-box only protein 8
Solyc06g063370.3	8.48	3.084	8.41e-18	up	2.527	2.641	1.661	23.794	20.275	25.817	2.276	23.295	RecName: Full=Chlorophyll a-b binding protein CP26, chloroplastic; AltName: Full=LHCB5; AltName: Full=LHCIIc; AltName: Full=Light-harvesting complex II protein 5; Fl
Solyc07g052370.3	9.044	3.177	6.06e-05	up	3.843	0.88	1.431	14.456	15.434	33.959	2.051	21.283	RecName: Full=Premnaspirodiene oxygenase; Short=HPO; AltName: Full=Cytochrome P450 71D55
Solyc03g044180.1	9.72	3.281	0.0004075	up	3.563	5.165	1.991	25.004	21.186	73.553	3.573	39.914	_
Solyc02g086530.3	10.928	3.45	6.52e-17	up	0.523	0.727	0.54	6.554	6.122	7.295	0.597	6.657	RecName: Full=Galactinol--sucrose galactosyltransferase; AltName: Full=Raffinose synthase
Solyc02g094270.2	13.91	3.798	0.004002	up	0.829	0.548	0.59	5.33	4.324	21.575	0.656	10.41	RecName: Full=Probable WRKY transcription factor 45; AltName: Full=AT.I.24-4; AltName: Full=WRKY DNA-binding protein 45
Solyc10g078230.2	15.116	3.918	3.49e-09	up	13.995	7.545	1095	161.79	194.37	167.28	10.83	174.48	RecName: Full=coumaric acid-3-hydroxylase
Solyc06g066230.3	16.807	4.071	2.58e-85	up	1.709	1.238	1.731	34.217	33.566	26.996	1.559	31.593	RecName: Full=Cytochrome P450 71D7
Solyc03g007380.2	19.093	4.255	0.01511	up	0.089	0.187	0.096	1.124	1.676	4.8	0.124	2.534	RecName: Full=Probable WRKY transcription factor 41; AltName: Full=WRKY DNA-binding protein 41
Solyc12g042590.2	21.288	4.412	5.68e-06	up	0.311	0.106	0.12	2.16	3.572	9.941	0.179	5.224	_
Solyc07g008020.3	42.254	5.401	0.009297	up	1.035	0.562	0.689	52.38	50.236	22.994	0.762	41.87	RecName: Full=Auxin-responsive protein IAA29; AltName: Full=Indoleacetic acid-induced protein 29
